# Supplementary material
Source: publisher figshare collection journal article supplement (https://acs.figshare.com/ndownloader/files/3935689)
Supplement: Supplementary file 1 [file 3935689]

Compound_ID,SMILES,% of efficacy as TRPM8 modulator at 0.5 mM,% of efficacy as TRPM8 modulator at 5 mM,% of efficacy as TRPM8 modulator at 50 mM,TRPM8 EC50 (mM),TRPM8 IC 50 (nM),
4,CN1C2=CC=CC=C2C(CCNCC3=CC=C(OC)C=C3)=C1,"32,26±6,74","59,81±24,48","196,11±19,54",,,
5,CN1C2=CC=CC=C2C(CCNCC3=CC=C(Cl)C=C3)=C1,"3,45±6,18","69,74±17.36","237,04±25,43",,,
6,CN1C2=CC=CC=C2C(CCNCCC3=CC=C(C4=CC=CC=C4)C=C3)=C1,"27,4±5,83","69,81±14,48","121,2±56,26",,,
7,COC1=CC(CCNCCC2=CN(CC3=CC=C(C4=CC=CC=C4)C=C3)C5=CC=CC=C52)=CC=C1OC,"26,24±10,01","42,11±20,12","255,35±31,48",,,
8,C12=CC=CC=C1C(CCNC3=CC=CC4=C3C=CC=C4)=CN2,"15,26±10,29","11,1±15,99","20,81±15,73",,,
9,C12=CC=CC=C1C(CCNC3=CC4=C(C=CC=C4)C=C3)=CN2,"6,57±7,62","5,31±9,26","-1,61±3,40",,,
10,C12=CC=CC=C1C(CCNC3=CC=CC4=C3C=CC=N4)=CN2,"13,06±6,18","10,21±7,66","-28,33±10,89",,,
11,C12=CC=CC=C1C(CCNC3=CC=CC4=C3C=CN=C4)=CN2,"1,39±0,05","0,06±1,29","-29,01±23,01",,,
12,C12=CC=CC=C1C(CCN(CC3=CC=CC=C3)CC4=CC=CC=C4)=CN2,"-40,32±7,96","-77,33±4,59","-101,15±5,26",,367±24,
14,C12=CC=CC=C1C(CCNCC3CCCC4=C3C=CC=C4)=CN2,"26,14±19,01","27,72±13,30","-93,81±8,81",,,
15,C12=CC=CC=C1C(CCNCC3=CC=CC4=C3C=CC=C4)=CN2,"32,11±8,40","64,31±18,91","275,2±38,22",,,
16,COC(C=CC1=C2C=CC=C1)=C2CNCCC3=CNC4=CC=CC=C43,"28,16±18,16","34,06±19,47","-98,61±13,93",,,
17,OC(C=CC1=C2C=CC=C1)=C2CNCCC3=CNC4=CC=CC=C43,"16,35±9,98","28,95±11,27","-100,06±11,44",,,
18,CC(C1=C2C=CC=C1)=C3C(C=CC=C3)=C2CNCCC4=CNC5=CC=CC=C54,"26,05±13,48","24,36±16,05","-78,10±14,08",,,
19,OC(C(OC)=C1)=CC=C1CNCCC2=CNC3=CC=CC=C32,"9,16±4,27","-16,56±12,54","-8,27±2,6",,,
20,COC1=CC(CNCCC2=CNC3=CC=CC=C32)=CC=C1OC,"8,06±7,89","4,72±7,50",n.d.,,,
21,C12=CC=CC=C1C(CCNCC3=CC=C(OC4=CC=CC=C4)C=C3)=CN2,"69,46±13,39","100,61±9,36","288,21±42,91",40±4,,
22,CN1C2=CC=CC=C2C(CCN(C)CC3=CC=C(OC4=CC=CC=C4)C=C3)=C1,"-59,86±2,02","-85,64±7,85","-101,6±3,14",,,
